1  
2  
3  
4  
5  
6  
7  
8  
9  
10  
11  
12  
13  
14  
15  
16  
17  
18  
19  
20  
21  
22  
23  
24  
25  
26  
27

## **Genomic analysis of *P* elements in natural populations of *Drosophila melanogaster*.**

**Casey M. Bergman<sup>1,\* †</sup>, Michael G. Nelson, Vladyslav Bondarenko<sup>2</sup>, Iryna A. Kozeretska<sup>2</sup>**

1 – Faculty of Life Sciences, University of Manchester, Manchester M21 0RG, United Kingdom

2 – Taras Shevchenko National University of Kyiv, 01601, 64 Volodymyrska str, Kyiv, Ukraine

† – Current address: Department of Genetics and Institute of Bioinformatics, University of Georgia, Athens, GA, 30602, USA

\* Address for Correspondence:

Casey Bergman, Ph.D.

Department of Genetics

University of Georgia

120 Green St.

Athens, GA 30602

[cbergman@uga.edu](mailto:cbergman@uga.edu)

Keywords: *P* element, *Drosophila melanogaster*, transposable elements, population genomics

## 28 **Abstract**

29 The *Drosophila melanogaster* *P* transposable element provides one of the best cases of horizontal  
30 transfer of a mobile DNA sequence in eukaryotes. Invasion of natural populations by the *P* element has  
31 led to a syndrome of phenotypes known as P-M hybrid dysgenesis that emerges when strains differing  
32 in their *P* element composition mate and produce offspring. Despite extensive research on many  
33 aspects of *P* element biology, many questions remain about the genomic basis of variation in P-M  
34 dysgenesis phenotypes in natural populations. Here we compare gonadal dysgenesis phenotypes and  
35 genomic *P* element predictions for isofemale strains obtained from three worldwide populations of  
36 *D. melanogaster* to illuminate the molecular basis of natural variation in cytotype status. We show that  
37 the number of predicted *P* element insertions in genome sequences from isofemale strains is highly  
38 correlated across different bioinformatics methods, but the absolute number of insertions per strain is  
39 sensitive to method and filtering strategies. Regardless of method used, we find that the number of  
40 euchromatic *P* element insertions predicted per strain varies significantly across populations, with  
41 strains from a North American population having fewer *P* element insertions than strains from  
42 populations sampled in Europe or Africa. Despite these geographic differences, numbers of  
43 euchromatic *P* element insertions are not strongly correlated with the degree of gonadal dysgenesis  
44 exhibited by an isofemale strain. Thus, variation in *P* element insertion numbers across different  
45 populations does not necessarily lead to corresponding geographic differences in gonadal dysgenesis  
46 phenotypes. Additionally, we show that pool-seq samples can uncover population differences in the  
47 number of *P* element insertions observed from isofemale lines, but that efforts to rigorously detect  
48 differences in the number of *P* elements across populations using pool-seq data must properly control  
49 for read depth per strain. Our work supports the view that euchromatic *P* element copy number is not  
50 sufficient to explain variation in gonadal dysgenesis across strains of *D. melanogaster*, and informs  
51 future efforts to decode the genomic basis of geographic and temporal differences in *P* element induced  
52 phenotypes.

## 53 **Introduction**

54 A substantial portion of eukaryotic genomes is represented by transposable elements (TEs). These TE  
55 families include those that colonized genomes long ago during the evolution of the host species and  
56 groups, but also those that have appeared in their host genomes recently. One of the best examples of a  
57 newly acquired TE is the *P* element in *Drosophila melanogaster* which is thought to have been  
58 acquired at least 70 years ago as a result of a horizontal transmission event from *D. willistoni*  
59 (Anxolabehere, Kidwell & Periquet, 1988; Daniels et al., 1990), a species that inhabits South America,  
60 the Caribbean, and southern parts of North America. Laboratory strains of *D. melanogaster* established  
61 from wild populations before the 1950s did not contain *P* element, while by the late 1970s this TE  
62 family was found in all natural populations worldwide (Anxolabehere, Kidwell & Periquet, 1988).

63  
64 Classical work has shown that the presence of *P* elements induces a number of phenotypes in *D.*  
65 *melnaogaster* that can be characterized by the so-called “P-M hybrid dysgenesis” assay (Kidwell,  
66 Kidwell & Sved, 1977). Among the most prominent *P* element induced phenotypes is gonadal  
67 dysgenesis (GD), which is the key marker determining P-M status in particular strains of flies (Kidwell,  
68 Kidwell & Sved, 1977; Engels & Preston, 1980). In the P-M system, fly strains can be categorized as  
69 follows: P-strains have the ability to activate and repress *P* element transposition, P'-strains only have  
70 the ability to activate *P* element transposition, Q-strains only have the ability to repress *P* element  
71 transposition, and M-strains have neither the ability to activate or repress *P* element transposition  
72 (Kidwell, Kidwell & Sved, 1977; Engels & Preston, 1980; Quesneville & Anxolab  h  re, 1998). M-  
73 strains that carry *P* element sequences in their genome are called M'-strains, while true M-strains are  
74 completely devoid of *P* elements (Bingham, Kidwell & Rubin, 1982). GD phenotypes were originally  
75 proposed to be mediated by repressor proteins encoded by full length *P* elements or truncated *P*  
76 elements that prevent *P* element transposition and subsequent DNA damage (Rio, 2002). Other work  
77 posits that these phenotypes mostly arise due to RNAi-based repression mediated by piRNAs produced  
78 by telomeric *P* elements and the effects are amplified by RNAs produced by other *P* elements  
79 (Simmons et al., 2014, 2015). More recently, some authors have questioned the classical view that GD  
80 phenotypes are caused solely by *P* elements or whether other factors may be involved (Zakharenko &  
81 Ignatenko, 2014; Ignatenko et al., 2015).

82  
83 To better understand *P* element invasion dynamics and the molecular mechanisms that underlie P-M  
84 hybrid dysgenesis, many studies have surveyed variation in GD phenotypes across natural populations

85 of *D. melanogaster* (Kidwell, Frydryk & Novy, 1983; Anxolabehere et al., 1985; Boussy & Kidwell,  
86 1987; Anxolabehere, Kidwell & Periquet, 1988; Anxolabehere et al., 1988; Boussy et al., 1988; Gamo  
87 et al., 1990; Matsuura et al., 1993; Itoh et al., 1999; Bonnivard & Higuët, 1999; Itoh et al., 2001, 2004,  
88 2007; Ogura et al., 2007; Onder & Bozcuk, 2012; Onder & Kasap, 2014; Ignatenko et al., 2015). These  
89 studies reveal that in most natural strains of *D. melanogaster* are P, Q, or M', but that there can be  
90 substantial variation in the frequency of GD phenotypes within and between populations. In addition,  
91 variation among populations in GD phenotypes is thought to be relatively stable since their initial  
92 transitions from M cytotype to P, Q and M' cytotypes (Gamo et al., 1990; Matsuura et al., 1993;  
93 Boussy et al., 1998; Bonnivard & Higuët, 1999; Itoh et al., 2001, 2004, 2007; Ogura et al., 2007). For  
94 example, Australian populations demonstrate a north-south cline of the frequency of various GD  
95 phenotypes (Boussy et al., 1987), which underwent only minor changes in the frequencies of truncated  
96 and full-size copies of the *P* element a decade later (Ogura et al., 2007).

97  
98 A number of studies have also used Southern blotting, *in situ* hybridization to polytene chromosomes,  
99 or PCR to understand how the genomic composition of *P* elements varies qualitatively in relation to  
100 GD phenotypes (Todo et al., 1984; Engels, 1984; Boussy et al., 1988; Itoh et al., 1999, 2001; Itoh &  
101 Boussy, 2002; Ruiz & Carareto, 2003; Itoh et al., 2007; Onder & Kasap, 2014; Ignatenko et al., 2015).  
102 These studies have revealed that, irrespective of GD phenotype, the majority of *D. melanogaster* strains  
103 harbor multiple copies of full-length *P* elements (FP) along with multiple copies of the truncated  
104 repressor element known as "KP", suggesting a complex relationship between the presence of different  
105 types of *P* elements in a genome and GD phenotypes. Attempts to quantify the relationship between  
106 absolute *P* element copy number or FP/KP ratios and GD phenotypes have revealed weak or no  
107 correlations between genomic *P* element composition and GD phenotypes (Todo et al., 1984; Engels,  
108 1984; Boussy et al., 1988; Ronsseray, Lehmann & Anxolabéhère, 1989; Rasmusson et al., 1990; Itoh et  
109 al., 1999; Bonnivard & Higuët, 1999; Itoh & Boussy, 2002; Itoh et al., 2004, 2007). However, these  
110 conclusions rely on estimates of *P* element copy number based on low-resolution hybridization data.

111  
112 The recent widespread availability of whole-genome shotgun sequences for *D. melanogaster* offers the  
113 possibility of new insights into the relationship between *P* element genomic content and GD  
114 phenotypes with unprecedented resolution. To date, hundreds of re-sequenced genomes of *D.*  
115 *melanogaster* exist and can be freely used for population and genomic analyses (Mackay et al., 2012;  
116 Pool et al., 2012; Lack et al., 2015; Bergman & Haddrill, 2015; Grenier et al., 2015; Lack et al., 2016).  
117 Moreover, a number of computational algorithms have been designed for *de novo* TE insertion

118 discovery, annotation, and population analysis in *Drosophila* (Kofler, Betancourt & Schlötterer, 2012;  
119 Linheiro & Bergman, 2012; Cridland et al., 2013; Nakagome et al., 2014; Zhuang et al., 2014; Rahman  
120 et al., 2015). Comparison of different methods for detecting TEs in *Drosophila* NGS data has shown  
121 that they identify different subsets of TE insertions (Song et al., 2014; Rahman et al., 2015), and thus  
122 determining which TE detection method is best for specific biological applications remains an area of  
123 active research (Ewing, 2015; Rishishwar, Marino-Ramirez & Jordan, 2016).

124

125 To better understand the molecular basis of differences in cytotypic status among populations, we  
126 investigated the relationship between GD phenotypes and *P* element predictions in whole genome  
127 shotgun sequences from three worldwide populations of *D. melanogaster*. By combining previously  
128 published GD assay data (Ignatenko et al., 2015) with *P* element predictions (this study) from genomic  
129 data of the same strains (Bergman & Haddrill, 2015), we show that the number of euchromatic *P*  
130 elements is not correlated with the degree of a GD phenotype exhibited by a strain. Furthermore, we  
131 show that populations can differ significantly in their euchromatic *P* element content, yet show similar  
132 distributions of GD phenotypes. We also investigate several bioinformatics strategies for detecting *P*  
133 element insertions in strain-specific and pooled genomic data to ensure robustness of our conclusions  
134 and help guide further genomic analysis. Our work supports previous conclusions that euchromatic *P*  
135 element copy number is not sufficient to explain variation in GD phenotypes, and informs future efforts  
136 to decode the genomic basis of differences in *P* element induced phenotypes over time and space.

137

## 138 **Materials and Methods**

139 ***Gonadal dysgenesis phenotypes.*** We re-analyzed GD assay data from (Ignatenko et al., 2015) for 43  
140 isofemale strains of *D. melanogaster* from three geographic regions: North America (Athens, Georgia,  
141 USA), Europe (Montpellier, France), and Africa (Accra, Ghana), described in (Verspoor & Haddrill,  
142 2011). Definitions of A and A\* crosses in (Ignatenko et al., 2015) are inverted relative to those  
143 proposed by (Engels & Preston, 1980), and were standardized prior to re-analysis here. Cross A  
144 measures the activity of tester strain males mated to M-strain Canton-S females; cross A\* measures the  
145 susceptibility of tester females mated to a P-strain Harwich males. P, P', Q, and M-strains were defined  
146 according to (Kidwell, Frydryk & Novy, 1983; Quesneville & Anxolabéhère, 1998).

147

148 ***Genome-wide identification of P element insertions.*** Whole genome shotgun sequences from the same  
149 *D. melanogaster* strains used for GD assays were downloaded from the European Nucleotide Archive

150 (ERP009059) (Bergman & Haddrill, 2015). These genomic data were collected using a uniform library  
151 preparation and sequencing strategy (thus mitigating many possible technical artifacts) and include data  
152 for both individual isofemale strains and pools of single flies from isofemale strains (see (Bergman &  
153 Haddrill, 2015) for details). In total, 43 isofemale strain genomes from (Bergman & Haddrill, 2015)  
154 were analyzed that had GD data in (Ignatenko et al., 2015). Two pool-seq samples were analyzed for  
155 each population [N. America (15 and 30 strains), Europe (20 and 39 strains), and Africa (15 and 32  
156 strains)]. Pool-seq samples contain one individual each from the same strains that have isofemale  
157 genomic data, plus additional strains that do not have GD data reported in (Ignatenko et al., 2015).

158

159 *P* element insertions were identified by TEMP (revision  
160 d2500b904e2020d6a1075347b398525ede5feae1; (Zhuang et al., 2014)) and RetroSeq (revision  
161 700d4f76a3b996686652866f2b81fefc6f0241e0; (Keane, Wong & Adams, 2013)) using the McClintock  
162 pipeline (revision 3ef173049360d99aaf7d13233f9d663691c73935;  
163 (<http://github.com/bergmanlab/mcclintock>; Nelson, Linheiro & Bergman, 2016)). McClintock was run  
164 across the major chromosome arms (chr2L, chr2R, chr3L, chr3R, chr4, chrY, and chrX) of the UCSC  
165 dm6 version of the Release 6 reference genome (Hoskins et al., 2015) using the following options: -C -  
166 m "retroseq temp" -i -p 12 -b. Reference TE annotations needed for TEMP were generated  
167 automatically by McClintock using RepeatMasker (version open-4.0.6). The *D. melanogaster* TE  
168 library used by McClintock to predict reference and non-reference TE insertions is a slightly modified  
169 version of the Berkeley *Drosophila* Genome Project TE data set v9.4.1  
170 ([https://github.com/cbergman/transposons/blob/master/misc/D\\_mel\\_transposon\\_sequence\\_set.fa](https://github.com/cbergman/transposons/blob/master/misc/D_mel_transposon_sequence_set.fa);  
171 described in (Sackton et al., 2009)).

172

173 In addition to providing "raw" output for each component method in the standardized zero-based BED6  
174 format, McClintock generates "filtered" output tailored for each method (Nelson, Linheiro & Bergman,  
175 2016). McClintock filters TEMP output to: (i) eliminate predictions where the start or end coordinates  
176 had negative values; (ii) retain predictions where there is sequence evidence supporting both ends of an  
177 insertion; and (iii) retain predictions that have a ratio of reads supporting the insertion to non-  
178 supporting reads of >1/10. Likewise, McClintock filters RetroSeq output to: (i) eliminate predictions  
179 where two different TE families shared the same coordinates; and (ii) retain predictions assigned a call  
180 status of greater than or equal to six as defined by (Keane, Wong & Adams, 2013).

181

182 Graphical and statistical analyses were performed in the R programming environment (version 3.3.2).

## 183 **Results**

### 184 *Comparison of cytotypic status and P element insertions in individual strains from North America,* 185 *Europe and Africa.*

186 To address whether genomic data can be used to understand how cytotypic status varies geographically  
187 and temporally, we identified *P* element insertions in publicly available genome sequences (Bergman  
188 & Haddrill, 2015) for a panel of 43 isofemale strains from three global regions with previously-  
189 published GD phenotypes (Ignatenko et al., 2015). As reported in (Ignatenko et al., 2015), isofemale  
190 strains from these populations were mainly P, M and Q (Figure 1, Table 1). Based on genomic analysis,  
191 all strains in these populations that are defined phenotypically as M are actually M' (File S1). For N.  
192 American and African populations, the degree of activity tends to vary more across strains relative to  
193 susceptibility (Table 1, Figure S1A–B). However, we found no evidence for systematic differences  
194 across populations in the degree of activity (One-way ANOVA;  $F=0.06$ , 2 d.f.,  $P=0.94$ ) or  
195 susceptibility (One-way ANOVA;  $F=1.66$ , 2 d.f.,  $P=0.2$ ) (Figure S1A–B).

196  
197 We predicted *P* element insertions in the genomes of these isofemale strains using two independent  
198 bioinformatics methods – TEMP (Zhuang et al., 2014) and RetroSeq (Keane, Wong & Adams, 2013) –  
199 to ensure that our conclusions are not dependent on the idiosyncrasies of a single TE detection software  
200 package (File S1, File S2). We also investigated the effects of the default filtering of TEMP and  
201 RetroSeq output performed by McClintock (Nelson, Linheiro & Bergman, 2016), a meta-pipeline that  
202 runs and parses multiple TE insertion detection methods. We note that neither TEMP nor RetroSeq  
203 attempt to differentiate full-length from truncated insertions in their output, and we omitted  
204 heterochromatic contigs from our analysis. Overall numbers of euchromatic *P* elements predicted per  
205 strain by the different methods were well correlated across strains, regardless of the method of analysis  
206 and filtering ( $r \geq 0.712$ ) (Figure 2). The highest correlation among methods was for the filtered TEMP  
207 and filtered RetroSeq datasets ( $r=0.945$ ). McClintock filtering substantially reduced the average  
208 number of TEMP predictions for all three populations, bringing them more closely in line with the  
209 numbers predicted by RetroSeq (Table 2). These results suggest that the filtering steps performed by  
210 McClintock improve the consistency of TE predictions made by TEMP and RetroSeq on isofemale  
211 strains, and that the filtered data are more likely to reflect the true *P* element content of these lines.

212  
213 The average number of *P* element insertions predicted per strain for all three populations is shown in  
214 Table 2. In general, McClintock filtered predictions data suggests these isofemale lines contain ~70-

215 120 *P* element insertion sites, which is roughly 2-fold higher than the 30-50 copies per haploid genome  
216 estimated from Southern blotting (Bingham, Kidwell & Rubin, 1982; Ronsseray, Lehmann &  
217 Anxolabéhère, 1989; Bonnivard & Higuët, 1999; Itoh & Boussy, 2002). These results are consistent  
218 with increased resolution of *P* element predictions based on genomic data plus residual heterozygosity  
219 due to incomplete inbreeding in these strains (Lack et al., 2016). In contrast to the lack of population  
220 difference observed at the phenotypic level, genomic data shows clear differences in the numbers of  
221 euchromatic *P* element insertions in strains from North American populations relative to the European  
222 and African populations, regardless of the TE detection method and filtering (One-way ANOVA;  
223  $F > 9.26$ ; 2 d.f.,  $P < 5e-4$ ) (Table 2; Figure S1C–F; Figure 3). Taken together with the GD data, these  
224 results suggest that population-level differences in the abundance of *P* elements per strain do not  
225 necessarily lead to population-level differences in the frequency of GD phenotypes.

226

227 Integrating published GD data with our genomic predictions at the level of individual strains, we  
228 directly tested whether the number of *P* elements per strain is associated with either GD phenotype. We  
229 found that neither the degree of activity (cross A) nor the degree of susceptibility (cross A\*) was  
230 significantly linearly correlated with the filtered number of predictions made by TEMP or RetroSeq  
231 ( $p > 0.11$ ; Figure 3). Similar results were obtained using the raw output of these methods as well (Figure  
232 S2). These results confirm results at the population level above and suggest that there is no simple  
233 relationship between the total number of euchromatic *P* elements and GD phenotypes at the level of  
234 individual strains.

235

### 236 ***Population difference in P element insertion numbers can be observed in pool-seq samples.***

237 Pooled-strain sequencing (pool-seq) is a cost-effective strategy to sample genomic variation across  
238 large numbers of strains and populations (Schlotterer et al., 2014). To address whether the differences  
239 among populations we observed in the number of *P* elements predicted in isofemale strain data are also  
240 seen in pool-seq data, we predicted *P* element insertions in pool-seq samples from the same populations  
241 (Table 3, File S2). Two pool-seq samples are available for each population that differ in the number of  
242 individuals (one per isofemale strain) used: North America ( $n=15$  and  $n=30$ ), Europe ( $n=20$  and  $n=39$ ),  
243 and Africa ( $n=15$  and  $n=32$ ). The smaller pools from each population include one individual from the  
244 same isofemale strains analyzed above; the larger pools contain one individual from the same strains as  
245 the smaller pools, plus individuals from additional isofemale strains from the same population that  
246 were not sequenced as isofemale strains. Thus, the smaller pool-seq samples are a nested subset of the



247 larger pool-seq samples, and pool-seq samples from the same population are not fully independent  
248 from one another.

249

250 The numbers of *P* element insertions identified by TEMP and RetroSeq in pool-seq samples are given  
251 for all three populations in Table 3. In the raw output, TEMP predicted more insertions in larger strain  
252 pools relative to smaller strain pools, as expected for a method designed to capture TE insertions that  
253 are polymorphic within a sample (Zhuang et al., 2014). However, McClintock-filtered TEMP output  
254 generated between 9-fold and 60-fold fewer insertions per sample in the pool-seq output relative to raw  
255 output, as well as fewer insertions overall in the larger strain pools relative to the smaller strain pools.  
256 These effects are likely because of the McClintock requirement for TEMP predictions to have the  
257 proportion of reads supporting the insertion to non-supporting reads to be >10%. In contrast,  
258 McClintock filtering reduced the total number of RetroSeq predictions by less than 2-fold, and fewer  
259 insertion sites were predicted for the larger strain pools in both raw and filtered RetroSeq output.

260

261 When the number of strains in a pool-seq sample was used as a scaling factor, pool-seq samples yield  
262 many fewer *P* element predictions per strain than the average number of *P* elements predicted from the  
263 same isofemale strains (Table 2, Table 3). This is expected because of lower sequencing per strain  
264 depth in the pooled samples relative to the isofemale line samples. Similarly, the scaled data shows  
265 fewer insertions were predicted per strain in the larger pools relative to smaller pools for all populations  
266 regardless of method or filtering (Table 3). This effect arises because larger and smaller strain pool  
267 samples contain similar numbers of reads (~44 million read pairs per sample), and thus larger strain  
268 pools have fewer reads per strain. Because pooled samples contain the same strains as isofemale lines  
269 and because smaller pools contain a subset of the same strains that are present in larger pools, these  
270 results suggest a dilution effect for *P* element detection in pool-seq samples: at a fixed sequencing  
271 coverage, *P* element insertions that are predicted in samples with higher coverage cannot be detected in  
272 samples with lower coverage, even though they are in fact present in the sample.

273

274 In spite of this dilution effect, African pool-seq samples tend to have more insertions per strain than  
275 North American samples (Table 3), similar to what is seen in the isofemale strain datasets (Figure 3,  
276 Table 2). This result is most clearly demonstrated for the comparison between North American and  
277 African samples which each had 15 strains, where the African sample has more predicted insertions  
278 regardless of TE detection method and filtering. These results suggest that, if dilution effects are

279 properly controlled for, pool-seq samples can capture general trends among populations in total *P*  
280 element insertion numbers that are seen in isofemale strain sequencing.

281

## 282 **Discussion**

283 Here we performed a detailed analysis of *P* element content in genomes of isofemale strains and pool-  
284 seq samples from three worldwide populations of *D. melanogaster* with published GD phenotypes. Our  
285 results allowed us to draw several conclusions about the detection of *P* element insertions in *D.*  
286 *melanogaster* population genomic data and the genomic basis of GD phenotypes that can be used to  
287 inform future studies.

288

289 For samples derived from isofemale strains, we find that two different TE detection methods (TEMP  
290 and RetroSeq) generate well-correlated numbers of *P* element predictions per strain (Figure 2), but that  
291 filtering by McClintock improves the overall correlation between these methods (mainly by reducing  
292 the number of presumably false positive TEMP predictions). In contrast, analysis of pool-seq samples  
293 revealed larger differences between TE detection methods and a larger effect of McClintock filtering  
294 (primarily because of how insertions that are polymorphic within a sample are handled). Pool-seq  
295 samples yield fewer predicted insertions per strain than the average number of insertions per strain for  
296 the same set of isofemale strains, most likely because of the lower per-strain sequencing coverage in  
297 pool-seq samples. Similarly, we found that there is a diminishing return on the number of *P* element  
298 insertions detected per strain in pool-seq samples for a given sequencing coverage, regardless of  
299 method or filtering. These dilution effects mean it will be difficult to compare *P* element predictions  
300 from pool-seq data with those from isofemale strains or to compare pool-seq samples to each other,  
301 unless the read depth per strain in the pool is carefully controlled. We note that the observation of  
302 diminishing returns for a fixed level of coverage in pool-seq samples does not contradict previous  
303 claims that (with increasing total sequencing coverage) there appears to be no diminishing return on  
304 detection of new TE insertions in *D. melanogaster* pool-seq samples (Rahman et al., 2015).

305

306 Regardless of prediction method, we found no simple linear relationship between the strength of GD  
307 phenotypes and the number of euchromatic *P* element insertions across isofemale strains (Figure 3).  
308 Our results are consistent with previous attempts to connect total numbers of *P* elements in a genome to  
309 GD phenotypes, which found weak or no correlations using Southern blotting or *in situ* hybridization to  
310 polytene chromosomes (Todo et al., 1984; Engels, 1984; Boussy et al., 1988; Ronsseray, Lehmann &

311 Anxolabéhère, 1989; Rasmusson et al., 1990; Itoh et al., 1999; Bonnivard & Higuët, 1999; Itoh &  
312 Boussy, 2002; Itoh et al., 2004, 2007). Assuming that GD assays using single reference strains provide  
313 robust insight into the GD phenotypes of these natural strains, our results are at face value consistent  
314 with recent arguments that the *P* element may not be the primary determinant of hybrid dysgenesis  
315 (Zakharenko & Ignatenko, 2014). However, our results are also consistent with GD phenotypes being  
316 determined by one or more active full-length *P* element insertions found in specific locations in the  
317 euchromatin, or by the relative abundance of full-length and truncated repressor elements, rather than  
318 overall copy numbers (which includes both active and inactive copies). Alternatively, the lack of  
319 correlation between the number of *P* element insertions and GD phenotypes may result from noise in  
320 the data due to the genomic sequence data not being of sufficient depth in these samples, or the GD  
321 assays having substantial experimental variation across lines.

322

323 Nevertheless, we did observe differences among populations in the number of predicted *P* element  
324 insertions per strain (Figure 3), even though no strong differences were observed in the levels of GD  
325 phenotypes across these populations. Specifically, strains from the North American population had the  
326 fewest predicted *P* element insertions, regardless of the TE detection method or filtering (Figure 3,  
327 Figure S1). This result is somewhat unexpected given that the *P* element is thought to have first been  
328 horizontally transferred into a North American population before invading the rest of the world  
329 (Anxolabehere, Kidwell & Periquet, 1988). This observation suggests that N. American populations  
330 may have evolved some form of copy number control not present in other populations. Evidence for  
331 fewer *P* element insertions per strain in the North American population could also be detected in pool-  
332 seq samples, especially when the number of strains per pool was controlled for (Table 3), indicating  
333 that pool-seq is a viable strategy for surveying differences in *P* element copy number across  
334 populations. Overall, our results show that it is possible to detect clear differences in euchromatic *P*  
335 element insertion profiles among populations using either isofemale strain or pool-seq genomic data,  
336 however interpreting how *P* element insertion site profiles relate to GD phenotypes at the strain or  
337 population level remains an open challenge.

338

### 339 **Acknowledgements**

340 We thank Lyudmila Zakharenko, Justin Blumenstiel, and Nelson Lau for helpful comments on a  
341 previous version of the manuscript. This work was supported by Wellcome Trust PhD Studentship  
342 (096602/B/11/Z) to MGN, a Human Frontier Science Program Young Investigator grant

343 RGY0093/2012 to CMB, a Biotechnology and Biological Sciences Research Council grant  
344 BB/L002817/1 (CMB), and free private repositories from GitHub (CMB).

345

## 346 **References**

- 347 Anxolabehere D., Charles-Palabost L., Fleuriet A., Periquet G. 1988. Temporal surveys of French  
348 populations of *Drosophila melanogaster*: P-M system, enzymatic polymorphism and infection  
349 by the sigma virus. *Heredity* 61:121–131.
- 350 Anxolabehere D., Kidwell MG., Periquet G. 1988. Molecular characteristics of diverse populations are  
351 consistent with the hypothesis of a recent invasion of *Drosophila melanogaster* by mobile P  
352 elements. *Molecular Biology and Evolution* 5:252–269.
- 353 Anxolabehere D., Nouaud D., Periquet G., Tchen P. 1985. P-element distribution in Eurasian  
354 populations of *Drosophila melanogaster*: A genetic and molecular analysis. *Proceedings of the*  
355 *National Academy of Sciences of the United States of America* 82:5418–5422.
- 356 Bergman CM., Haddrill PR. 2015. Strain-specific and pooled genome sequences for populations of  
357 *Drosophila melanogaster* from three continents. *F1000Research*. DOI:  
358 10.12688/f1000research.6090.1.
- 359 Bingham PM., Kidwell MG., Rubin GM. 1982. The molecular basis of P-M hybrid dysgenesis: the role  
360 of the P element, a P-strain-specific transposon family. *Cell* 29:995–1004.
- 361 Bonnivard E., Higuete D. 1999. Stability of European natural populations of *Drosophila melanogaster*  
362 with regard to the P–M system: a buffer zone made up of Q populations. *Journal of*  
363 *Evolutionary Biology* 12:633–647. DOI: 10.1046/j.1420-9101.1999.00063.x.
- 364 Boussy IA., Healy MJ., Oakeshott JG., Kidwell MG. 1988. Molecular analysis of the P-M gonadal  
365 dysgenesis cline in eastern Australian *Drosophila melanogaster*. *Genetics* 119:889–902.
- 366 Boussy IA., Itoh M., Rand D., Woodruff RC. 1998. Origin and decay of the P element-associated  
367 latitudinal cline in Australian *Drosophila melanogaster*. *Genetica* 104:45–57. DOI:  
368 10.1023/A:1003469131647.
- 369 Boussy IA., Kidwell MG. 1987. The P-M hybrid dysgenesis cline in Eastern Australian *Drosophila*  
370 *melanogaster*: discrete P, Q and M regions are nearly contiguous. *Genetics* 115:737–745.
- 371 Cridland JM., Macdonald SJ., Long AD., Thornton KR. 2013. Abundance and Distribution of  
372 Transposable Elements in Two *Drosophila* QTL Mapping Resources. *Molecular Biology and*  
373 *Evolution* 30:2311–2327. DOI: 10.1093/molbev/mst129.

- 374 Daniels SB., Peterson KR., Strausbaugh LD., Kidwell MG., Chovnick A. 1990. Evidence for horizontal  
375 transmission of the P transposable element between *Drosophila* species. *Genetics* 124:339–55.
- 376 Engels WR. 1984. A trans-acting product needed for P factor transposition in *Drosophila*. *Science (New*  
377 *York, N.Y.)* 226:1194–1196.
- 378 Engels WR., Preston CR. 1980. Components of hybrid dysgenesis in a wild population of *Drosophila*  
379 *melanogaster*. *Genetics* 95:111–128.
- 380 Ewing AD. 2015. Transposable element detection from whole genome sequence data. *Mobile DNA*  
381 6:24. DOI: 10.1186/s13100-015-0055-3.
- 382 Gamo S., Sakajo M., Ikeda K., Inoue YH., Sakoyama Y., Nakashima-Tanaka E. 1990. Temporal  
383 distribution of P elements in *Drosophila melanogaster* strains from natural populations in Japan.  
384 *Idengaku Zasshi* 65:277–285.
- 385 Grenier JK., Arguello JR., Moreira MC., Gottipati S., Mohammed J., Hackett SR., Boughton R.,  
386 Greenberg AJ., Clark AG. 2015. Global Diversity Lines—A Five-Continent Reference Panel of  
387 Sequenced *Drosophila melanogaster* Strains. *G3: Genes|Genomes|Genetics* 5:593–603. DOI:  
388 10.1534/g3.114.015883.
- 389 Hoskins RA., Carlson JW., Wan KH., Park S., Mendez I., Galle SE., Booth BW., Pfeiffer BD., George  
390 RA., Svirskas R., Krzywinski M., Schein J., Accardo MC., Damia E., Messina G., Méndez-  
391 Lago M., de Pablos B., Demakova OV., Andreyeva EN., Boldyreva LV., Marra M., Carvalho  
392 AB., Dimitri P., Villasante A., Zhimulev IF., Rubin GM., Karpen GH., Celniker SE. 2015. The  
393 Release 6 reference sequence of the *Drosophila melanogaster* genome. *Genome Research*  
394 25:445–458. DOI: 10.1101/gr.185579.114.
- 395 Ignatenko OM., Zakharenko LP., Dorogova NV., Fedorova SA. 2015. P elements and the determinants  
396 of hybrid dysgenesis have different dynamics of propagation in *Drosophila melanogaster*  
397 populations. *Genetica* 143:751–759. DOI: 10.1007/s10709-015-9872-z.
- 398 Itoh M., Boussy IA. 2002. Full-size P and KP elements predominate in wild *Drosophila melanogaster*.  
399 *Genes & Genetic Systems* 77:259–267.
- 400 Itoh M., Fukui T., Kitamura M., Uenoyama T., Watada M., Yamaguchi M. 2004. Phenotypic stability  
401 of the P-M system in wild populations of *Drosophila melanogaster*. *Genes & Genetic Systems*  
402 79:9–18.
- 403 Itoh M., Sasai N., Inoue Y., Watada M. 2001. P elements and P-M characteristics in natural populations  
404 of *Drosophila melanogaster* in the southernmost islands of Japan and in Taiwan. *Heredity*  
405 86:206–12.

- 406 Itoh M., Takeuchi N., Yamaguchi M., Yamamoto M-T., Boussy IA. 2007. Prevalence of full-size P and  
407 KP elements in North American populations of *Drosophila melanogaster*. *Genetica* 131:21–28.  
408 DOI: 10.1007/s10709-006-9109-2.
- 409 Itoh M., Woodruff RC., Leone MA., Boussy IA. 1999. Genomic P elements and P-M characteristics of  
410 eastern Australian populations of *Drosophila melanogaster*. *Genetica* 106:231–45.
- 411 Keane TM., Wong K., Adams DJ. 2013. RetroSeq: transposable element discovery from next-  
412 generation sequencing data. *Bioinformatics* 29:389–390. DOI: 10.1093/bioinformatics/bts697.
- 413 Kidwell MG., Frydryk T., Novy JB. 1983. The hybrid dysgenesis potential of *Drosophila melanogaster*  
414 strains of diverse temporal and geographical natural origins. *Drosophila Information Service*  
415 59:63–69.
- 416 Kidwell MG., Kidwell JF., Sved JA. 1977. Hybrid Dysgenesis in *Drosophila melanogaster*: A  
417 Syndrome of Aberrant Traits Including Mutation, Sterility and Male Recombination. *Genetics*  
418 86:813–833.
- 419 Kofler R., Betancourt AJ., Schlötterer C. 2012. Sequencing of pooled DNA samples (pool-seq)  
420 uncovers complex dynamics of transposable element insertions in *Drosophila melanogaster*.  
421 *PLoS Genet* 8:e1002487. DOI: 10.1371/journal.pgen.1002487.
- 422 Lack JB., Cardeno CM., Crepeau MW., Taylor W., Corbett-Detig RB., Stevens KA., Langley CH.,  
423 Pool JE. 2015. The *Drosophila* Genome Nexus: A Population Genomic Resource of 623  
424 *Drosophila melanogaster* Genomes, Including 197 from a Single Ancestral Range Population.  
425 *Genetics*:genetics.115.174664. DOI: 10.1534/genetics.115.174664.
- 426 Lack JB., Lange JD., Tang AD., Corbett-Detig RB., Pool JE. 2016. A Thousand Fly Genomes: An  
427 Expanded *Drosophila* Genome Nexus. *Molecular Biology and Evolution* 33:3308–3313. DOI:  
428 10.1093/molbev/msw195.
- 429 Linheiro RS., Bergman CM. 2012. Whole genome resequencing reveals natural target site preferences  
430 of transposable elements in *Drosophila melanogaster*. *PLoS ONE* 7:e30008. DOI:  
431 10.1371/journal.pone.0030008.
- 432 Mackay TFC., Richards S., Stone EA., Barbadilla A., Ayroles JF., Zhu D., Casillas S., Han Y.,  
433 Magwire MM., Cridland JM., Richardson MF., Anholt RRH., Barrón M., Bess C., Blankenburg  
434 KP., Carbone MA., Castellano D., Chaboub L., Duncan L., Harris Z., Javaid M., Jayaseelan JC.,  
435 Jhangiani SN., Jordan KW., Lara F., Lawrence F., Lee SL., Librado P., Linheiro RS., Lyman  
436 RF., Mackey AJ., Munidasa M., Muzny DM., Nazareth L., Newsham I., Perales L., Pu L-L., Qu  
437 C., Ràmia M., Reid JG., Rollmann SM., Rozas J., Saada N., Turlapati L., Worley KC., Wu Y-  
438 Q., Yamamoto A., Zhu Y., Bergman CM., Thornton KR., Mittelman D., Gibbs RA. 2012. The

- 439 *Drosophila melanogaster* genetic reference panel. *Nature* 482:173–178. DOI:  
440 10.1038/nature10811.
- 441 Matsuura ET., Takada S., Kato H., Niizeki S., Chigusa SI. 1993. Hybrid dysgenesis in natural  
442 populations of *Drosophila melanogaster* in Japan. III. The P-M system in and around Japan.  
443 *Genetica* 90:9–16.
- 444 Nakagome M., Solovieva E., Takahashi A., Yasue H., Hirochika H., Miyao A. 2014. Transposon  
445 Insertion Finder (TIF): a novel program for detection of de novo transpositions of transposable  
446 elements. *BMC bioinformatics* 15:71. DOI: 10.1186/1471-2105-15-71.
- 447 Nelson MG., Linheiro RS., Bergman CM. 2016. McClintock: An integrated pipeline for detecting  
448 transposable element insertions in whole genome shotgun sequencing data. *bioRxiv*:095372.  
449 DOI: 10.1101/095372.
- 450 Ogura K., Woodruff RC., Itoh M., Boussy IA. 2007. Long-term patterns of genomic P element content  
451 and P-M characteristics of *Drosophila melanogaster* in eastern Australia. *Genes & Genetic*  
452 *Systems* 82:479–487.
- 453 Onder BS., Bozcuk AN. 2012. P-M phenotypes and their correlation with longitude in natural  
454 populations of *Drosophila melanogaster* from Turkey. *Russian Journal of Genetics* 48:1170–  
455 1176. DOI: 10.1134/S1022795412120083.
- 456 Onder BS., Kasap OE. 2014. P element activity and molecular structure in *Drosophila melanogaster*  
457 populations from Firtina Valley, Turkey. *Journal of Insect Science (Online)* 14:16. DOI:  
458 10.1093/jis/14.1.16.
- 459 Pool JE., Corbett-Detig RB., Sugino RP., Stevens KA., Cardeno CM., Crepeau MW., Duchon P.,  
460 Emerson JJ., Saelao P., Begun DJ., Langley CH. 2012. Population Genomics of Sub-Saharan  
461 *Drosophila melanogaster*: African Diversity and Non-African Admixture. *PLoS Genet*  
462 8:e1003080. DOI: 10.1371/journal.pgen.1003080.
- 463 Quesneville H., Anxolabéhère D. 1998. Dynamics of transposable elements in metapopulations: a  
464 model of P element invasion in *Drosophila*. *Theoretical Population Biology* 54:175–93. DOI:  
465 10.1006/tpbi.1997.1353.
- 466 Rahman R., Chirn G., Kanodia A., Sytnikova YA., Brembs B., Bergman CM., Lau NC. 2015. Unique  
467 transposon landscapes are pervasive across *Drosophila melanogaster* genomes. *Nucleic Acids*  
468 *Research* 43:10655–10672. DOI: 10.1093/nar/gkv1193.
- 469 Rasmusson KE., Simmons MJ., Raymond JD., McLarnon CF. 1990. Quantitative effects of P elements  
470 on hybrid dysgenesis in *Drosophila melanogaster*. *Genetics* 124:647–662.

- 471 Rio DC. 2002. P transposable elements in *Drosophila melanogaster*. In: Craig N ed. *Mobile DNA II*.  
472 Washington, D.C.: ASM Press, 484–518.
- 473 Rishishwar L., Marino-Ramirez L., Jordan IK. 2016. Benchmarking computational tools for  
474 polymorphic transposable element detection. *Briefings in Bioinformatics*:bbw072. DOI:  
475 10.1093/bib/bbw072.
- 476 Ronsseray S., Lehmann M., Anxolabéhère D. 1989. Copy number and distribution of P and I mobile  
477 elements in *Drosophila melanogaster* populations. *Chromosoma* 98:207–214.
- 478 Ruiz MT., Carareto CMA. 2003. Copy number of P elements, KP/full-sized P element ratio and their  
479 relationships with environmental factors in Brazilian *Drosophila melanogaster* populations.  
480 *Heredity* 91:570–576. DOI: 10.1038/sj.hdy.6800360.
- 481 Sackton TB., Kulathinal RJ., Bergman CM., Quinlan AR., Dopman EB., Carneiro M., Marth GT.,  
482 Hartl DL., Clark AG. 2009. Population genomic inferences from sparse high-throughput  
483 sequencing of two populations of *Drosophila melanogaster*. *Genome Biol Evol* 1:449–65. DOI:  
484 10.1093/gbe/evp048.
- 485 Schlotterer C., Tobler R., Kofler R., Nolte V. 2014. Sequencing pools of individuals - mining genome-  
486 wide polymorphism data without big funding. *Nature Reviews. Genetics* 15:749–763. DOI:  
487 10.1038/nrg3803.
- 488 Simmons MJ., Meeks MW., Jessen E., Becker JR., Buschette JT., Thorp MW. 2014. Genetic  
489 interactions between P elements involved in piRNA-mediated repression of hybrid dysgenesis  
490 in *Drosophila melanogaster*. *G3 (Bethesda, Md.)* 4:1417–1427. DOI: 10.1534/g3.114.011221.
- 491 Simmons MJ., Thorp MW., Buschette JT., Becker JR. 2015. Transposon regulation in *Drosophila*:  
492 piRNA-producing P elements facilitate repression of hybrid dysgenesis by a P element that  
493 encodes a repressor polypeptide. *Molecular genetics and genomics: MGG* 290:127–140. DOI:  
494 10.1007/s00438-014-0902-9.
- 495 Song J., Liu J., Schnakenberg SL., Ha H., Xing J., Chen KC. 2014. Variation in piRNA and  
496 Transposable Element Content in Strains of *Drosophila melanogaster*. *Genome Biology and*  
497 *Evolution* 6:2786–2798. DOI: 10.1093/gbe/evu217.
- 498 Todo T., Sakoyama Y., Chigusa SI., Fukunaga A., Honjo T., Kondo S. 1984. Polymorphism in  
499 distribution and structure of P-elements in natural populations of *Drosophila melanogaster* in  
500 and around Japan. *Japanese Journal of Genetics [Idengaku Zasshi]* 59:441–451.
- 501 Verspoor RL., Haddrill PR. 2011. Genetic Diversity, Population Structure and Wolbachia Infection  
502 Status in a Worldwide Sample of *Drosophila melanogaster* and *D. simulans* Populations. *PLoS*  
503 *ONE* 6:e26318. DOI: 10.1371/journal.pone.0026318.



- 504 Zakharenko LP., Ignatenko OM. 2014. The rate of transposition and the specificity of transposable  
505 element insertions are not sufficient to cause gonadal dysgenesis in *Drosophila melanogaster*.  
506 *Genetika* 50:1386–1389.
- 507 Zhuang J., Wang J., Theurkauf W., Weng Z. 2014. TEMP: a computational method for analyzing  
508 transposable element polymorphism in populations. *Nucleic Acids Research* 42:6826–6838.  
509 DOI: 10.1093/nar/gku323.  
510

511 **Tables**

512 **Table 1.** Gonadal dysgenesis (GD) levels and P-M status for isofemale strains of *D. melanogaster*  
513 obtained from natural populations in North America, Europe and Africa. %GD for cross A (tester strain  
514 males versus M-strain Canton-S females) and cross A\* (P-strain Harwich males versus tester strain  
515 females) are based on data reported in (Ignatenko et al., 2015). Cross A and A\* labels in (Ignatenko et  
516 al., 2015) are inverted relative to those proposed by (Engels & Preston, 1980) and were converted to  
517 standard labels prior to analysis here. P-M status for individual strains is according to (Ignatenko et al.,  
518 2015). Phenotypically M-strains are in fact M<sup>2</sup>-strains based on analysis of genomic data (File S1, File  
519 S2).

520

| <b>Population</b> | <b>Year of collection</b> | <b>Cross A (%GD±SD)</b> | <b>Cross A* (%GD±SD)</b> | <b># strains</b> | <b>M</b> | <b>Q</b> | <b>P'</b> | <b>P</b> |
|-------------------|---------------------------|-------------------------|--------------------------|------------------|----------|----------|-----------|----------|
| N. America        | 2009                      | 13.4±12.3               | 5.4±8.6                  | 14               | 3        | 4        | 0         | 7        |
| Europe            | 2010                      | 6.1±12.2                | 6.8±14.0                 | 17               | 2        | 12       | 1         | 2        |
| Africa            | 2010                      | 16.3±22.8               | 6.0±5.9                  | 12               | 1        | 8        | 1         | 2        |
| Total             |                           |                         |                          | 43               | 6        | 24       | 2         | 11       |

521

522 **Table 2.** Average numbers ( $\pm$ S.D.) of *P* element insertions identified by TEMP and RetroSeq in  
523 isofemale strains from three worldwide populations of *D. melanogaster*. Columns labeled raw and  
524 filtered represent output generated by each method before or after default filtering by McClintock,  
525 respectively (see Materials and Methods for details).

526

| Population | # strains | TEMP             | TEMP             | RetroSeq         | RetroSeq         |
|------------|-----------|------------------|------------------|------------------|------------------|
|            |           | raw              | filtered         | raw              | filtered         |
| N. America | 14        | 159.8 $\pm$ 50.3 | 68.3 $\pm$ 9.1   | 83.3 $\pm$ 16.3  | 76.7 $\pm$ 14.3  |
| Europe     | 17        | 232.6 $\pm$ 59.6 | 106.2 $\pm$ 13.1 | 124.4 $\pm$ 21.2 | 114.5 $\pm$ 17.4 |
| Africa     | 12        | 232.8 $\pm$ 41.2 | 106.8 $\pm$ 14.5 | 129.3 $\pm$ 20.0 | 119.2 $\pm$ 14.5 |

527

528 **Table 3.** Numbers of *P* element insertions identified by TEMP and RetroSeq in pool-seq samples from  
529 three worldwide populations of *D. melanogaster*. Numbers in parentheses are numbers of insertions  
530 scaled by the number of strains in the pool. Columns labeled raw and filtered represent output  
531 generated by each method before or after default filtering by McClintock, respectively (see Materials  
532 and Methods for details).

533

| <b>Population</b> | <b># strains</b> | <b>TEMP</b>  | <b>TEMP</b>     | <b>RetroSeq</b> | <b>RetroSeq</b> |
|-------------------|------------------|--------------|-----------------|-----------------|-----------------|
|                   |                  | <b>raw</b>   | <b>filtered</b> | <b>raw</b>      | <b>filtered</b> |
| N. America        | 15               | 684 (45.6)   | 53 (3.5)        | 312 (20.8)      | 219 (14.6)      |
| N. America        | 30               | 1,101 (36.7) | 27 (0.9)        | 259 (8.6)       | 159 (5.3)       |
| Europe            | 20               | 1,003 (50.1) | 85 (4.2)        | 372 (18.6)      | 245 (12.2)      |
| Europe            | 39               | 1,395 (35.8) | 46 (1.2)        | 278 (7.1)       | 171 (4.4)       |
| Africa            | 15               | 958 (63.9)   | 110 (7.3)       | 505 (33.7)      | 348 (23.2)      |
| Africa            | 32               | 1,681 (52.5) | 28 (0.9)        | 329 (10.3)      | 193 (6.0)       |

534

535 **Figure Legends**

536 **Figure 1.** Results of GD tests for isofemale strains from natural populations from North America,  
537 Europe and Africa. %GD for cross A (tester strain males versus M-strain Canton-S females, vertical  
538 axis) and cross A\* (P-strain Harwich males versus tester strain females, horizontal axis) are based on  
539 data reported in (Ignatenko et al., 2015). Cross A and A\* labels in (Ignatenko et al., 2015) are inverted  
540 relative to those proposed by (Engels & Preston, 1980) and were converted to standard labels prior to  
541 analysis here. Each dot represents an isofemale strain. The P-M status for various sectors of GD  
542 phenotypic space defined by A and A\* crosses are according to (Kidwell, Frydryk & Novy, 1983;  
543 Quesneville & Anxolabéhère, 1998) are shown in panel A.

544  
545 **Figure 2.** Correlation among methods in the numbers of predicted *P* element insertions for a worldwide  
546 sample of isofemale strains from North America, Europe and Africa. Numbers of *P* elements predicted  
547 by TEMP or RetroSeq shown are before (raw) and after (filtered) filtering by McClintock (see methods  
548 for details). Each circle represents an isofemale strain. Note that the scales on the x-axis and y-axis  
549 vary for each method.

550  
551 **Figure 3.** Relationship between %GD in A and A\* crosses and filtered numbers of euchromatic *P*  
552 element insertions identified by TEMP or RetroSeq for isofemale strains from natural populations from  
553 North America, Europe and Africa. %GD data are from [46] and use the same standardized definitions  
554 as in Figure 1. Numbers of *P* elements predicted by TEMP or RetroSeq shown here are after filtering  
555 by McClintock (see Materials and Methods for details). Analogous results for unfiltered raw output of  
556 TEMP or RetroSeq are shown in Figure S2. Each triangle represents an isofemale strain.

## 557 **Supplemental Files**

558 **File S1.** Tab separated value (TSV) formatted file with %GD data from A and A\* crosses, P-M  
559 cytotype status, population, and numbers of predicted *P* elements in raw and filtered output from  
560 TEMP and RetroSeq, respectively, for 43 isofemale strains from three global regions. GD data are  
561 taken from (Ignatenko et al., 2015) and were standardized to definitions proposed by (Engels &  
562 Preston, 1980) prior to re-analysis here.

563

564 **File S2.** Zip archive of browser extensible data (BED) files of predicted *P* element locations in genome  
565 sequences from 50 isofemale strains and 6 pool-seq samples from three global regions. Each sample  
566 has four BED files corresponding to raw (\*raw.bed) and filtered (\*nonredundant.bed) output from  
567 TEMP and RetroSeq, respectively. BED files for 7 isofemale strains from (Bergman & Haddrill, 2015)  
568 are included here that do not have GD data in (Ignatenko et al., 2015) but are included in the pool-seq  
569 samples, allowing comparisons to be made between isofemale strains and pool-seq samples for the  
570 same set of strains.

571

572 **Figure S1.** Distributions of %GD in A and A\* crosses and numbers of predicted *P* element insertions  
573 for isofemale strains within and between populations from three worldwide regions. Distributions are  
574 shown as boxplots with black lines representing median values, boxes representing the interquartile  
575 range (IQR), whiskers representing the limits of values for strains that lie within 1.5 x IQR of the upper  
576 or lower quartiles, and circles representing strains that lie outside 1.5 x IQR of the upper or lower  
577 quartiles. GD data are taken from (Ignatenko et al., 2015) and were standardized to definitions  
578 proposed by (Engels & Preston, 1980) prior to re-analysis here. Numbers of *P* elements predicted by  
579 TEMP or RetroSeq shown are before (raw) and after (filtered) standard filtering by McClintock.

580

581 **Figure S2.** Relationship between %GD in A and A\* crosses and raw numbers of euchromatic *P*  
582 element insertions identified by TEMP or RetroSeq for isofemale strains from natural populations from  
583 North America, Europe and Africa. %GD data are from (Ignatenko et al., 2015) and are the same  
584 standardized values as in Figure 1. Numbers of *P* elements predicted by TEMP or RetroSeq shown are  
585 raw output prior to standard filtering by McClintock. Analogous results for McClintock-filtered output  
586 of TEMP and RetroSeq are shown in Figure 3. Each triangle represents an isofemale strain.

Figure 1

**A. P-M cyotype status**

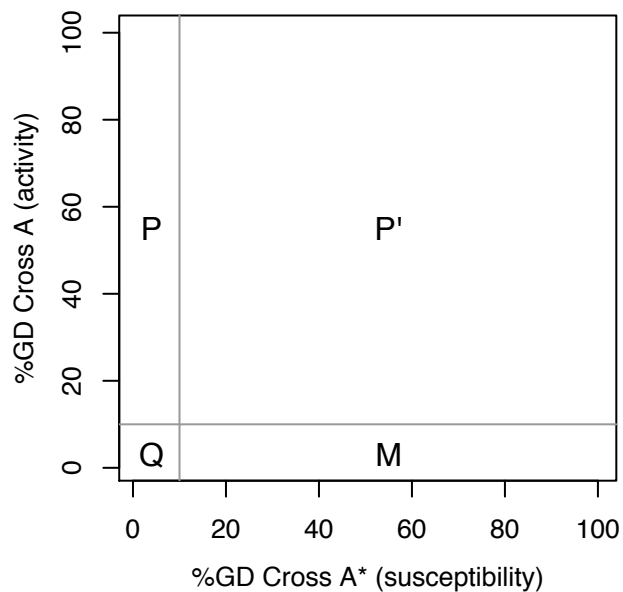

**B. North America (Athens, Georgia, USA)**

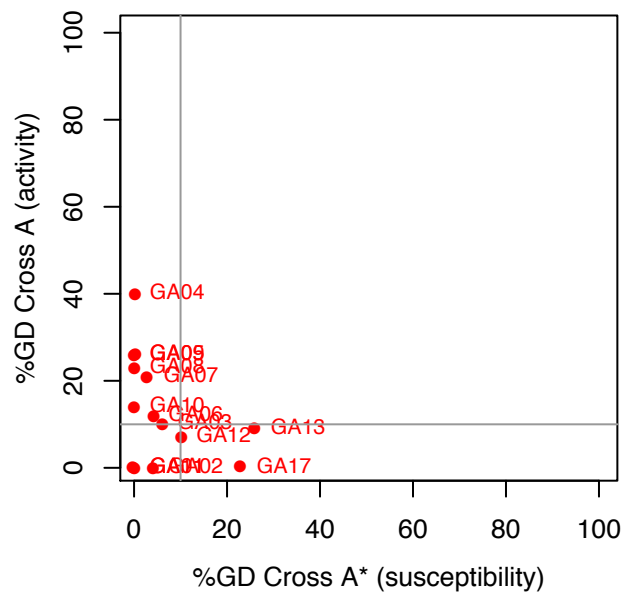

**C. Europe (Montpellier, France)**

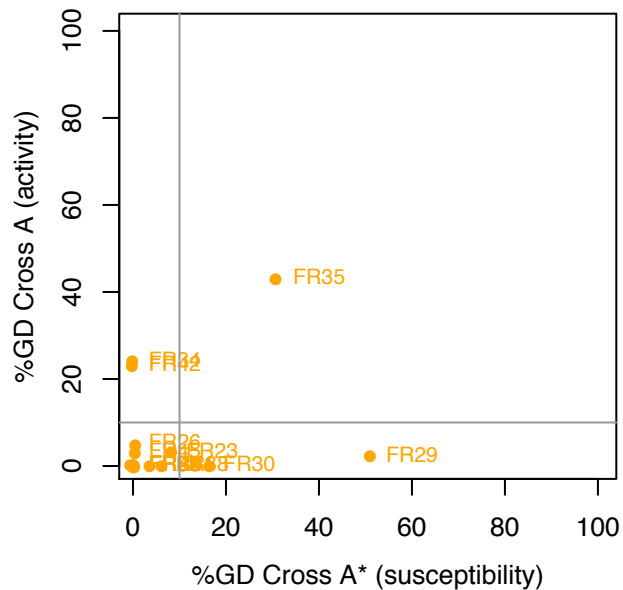

**D. Africa (Accra, Ghana)**

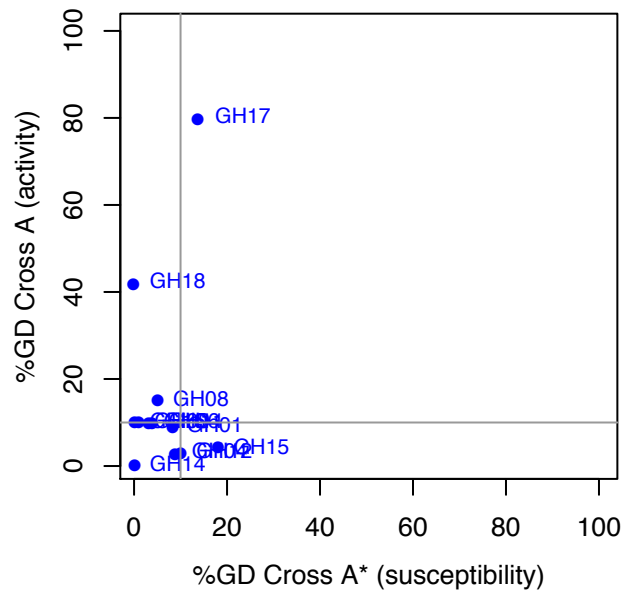

Figure 2

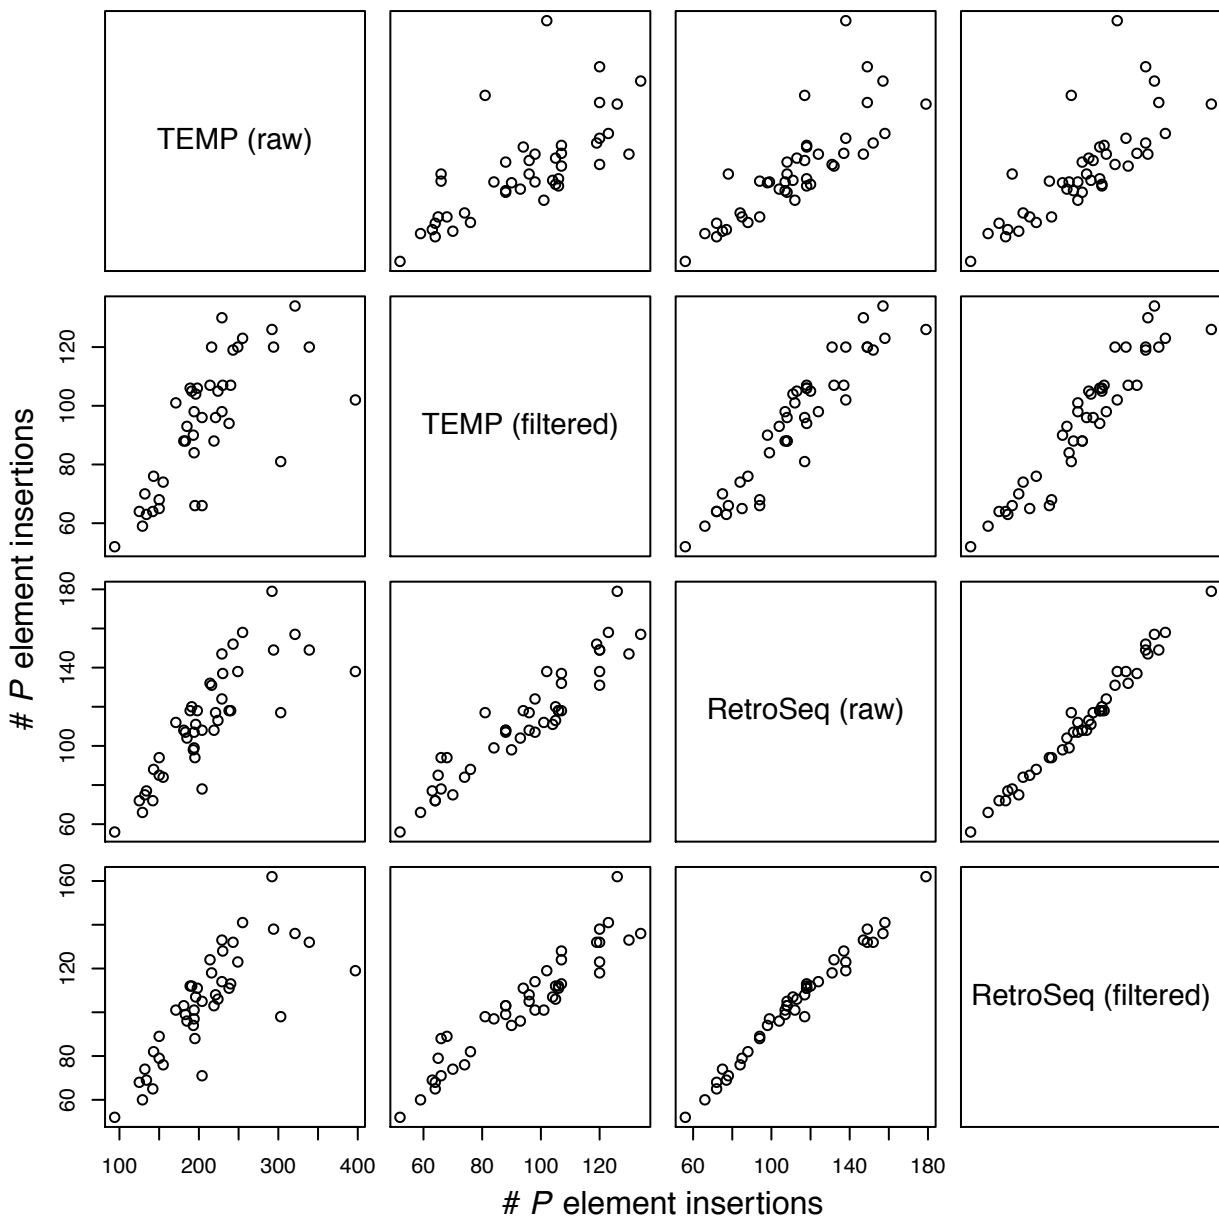



Figure 3

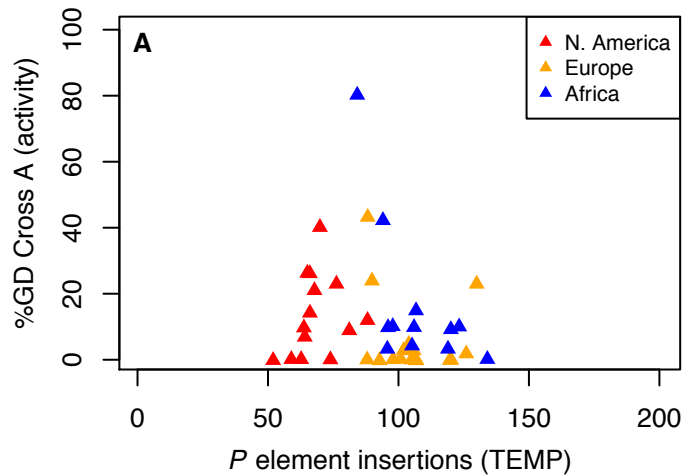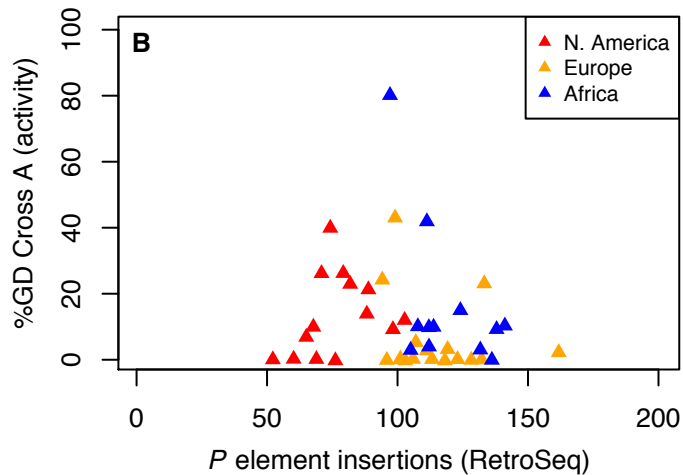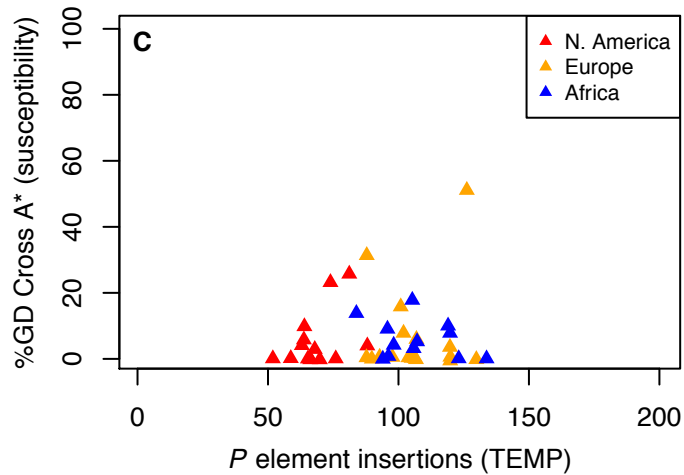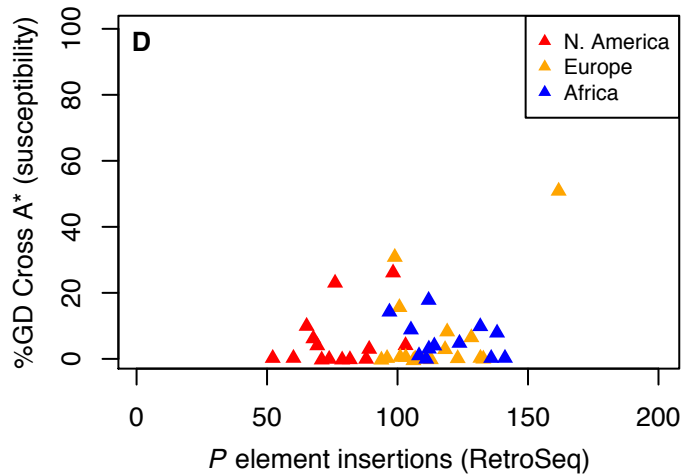

Figure S1

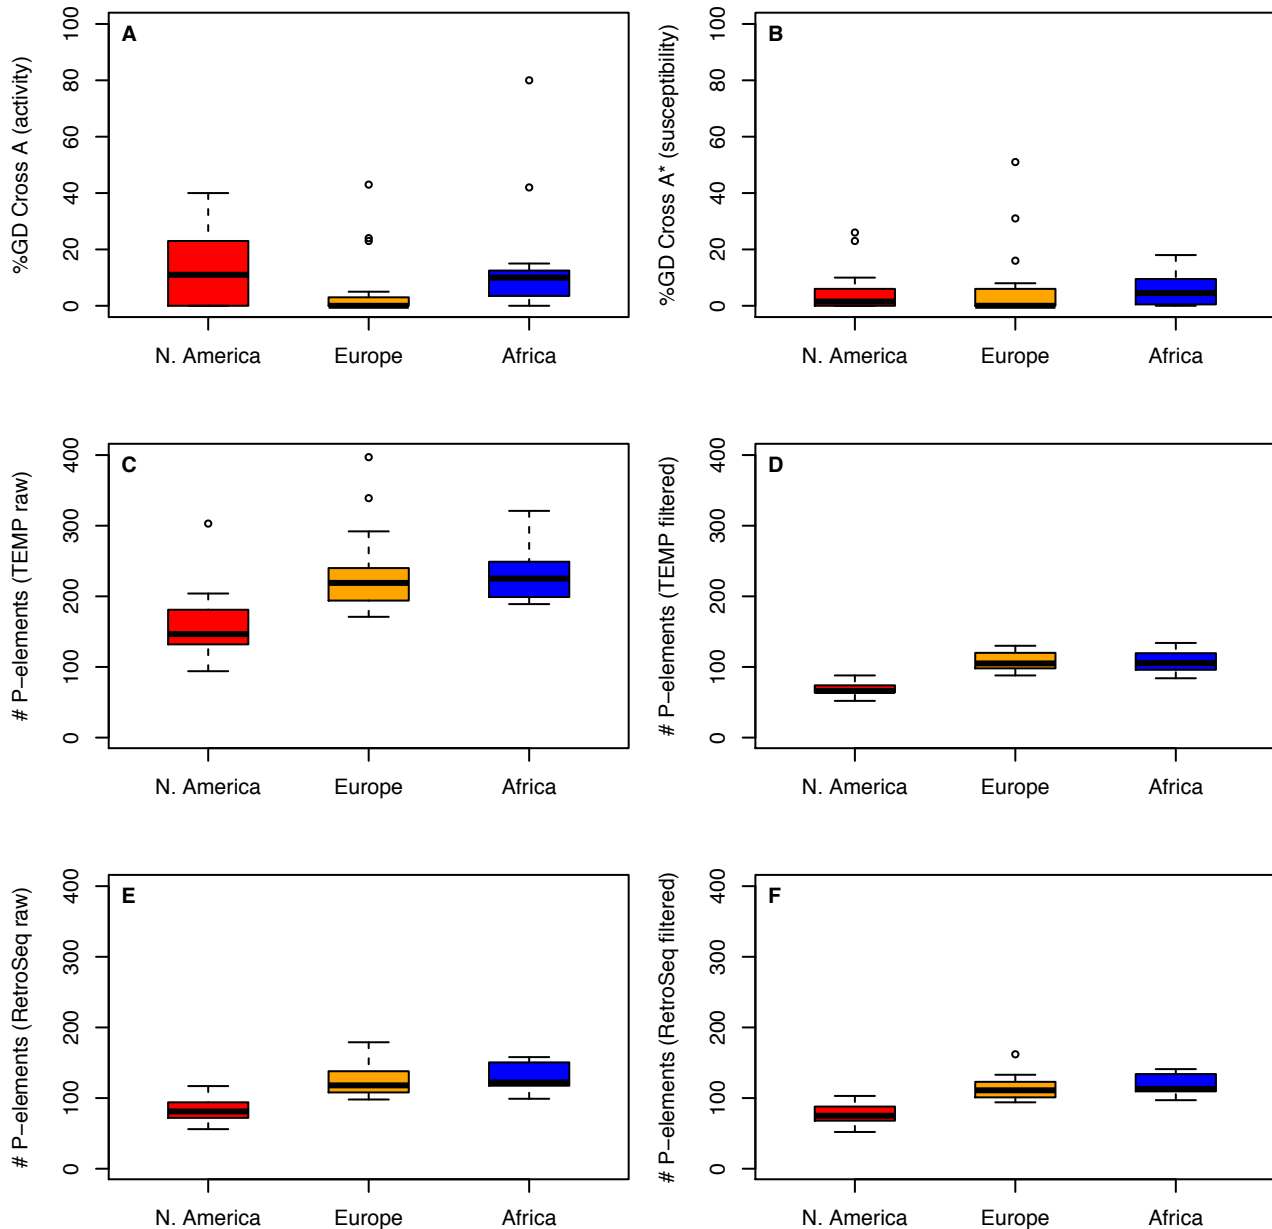

Figure S2

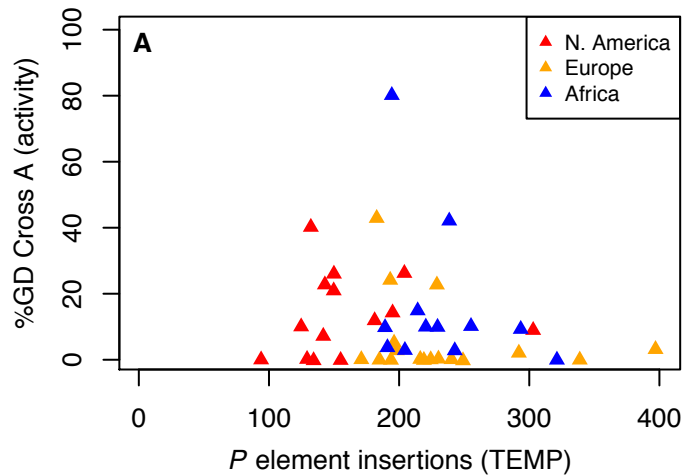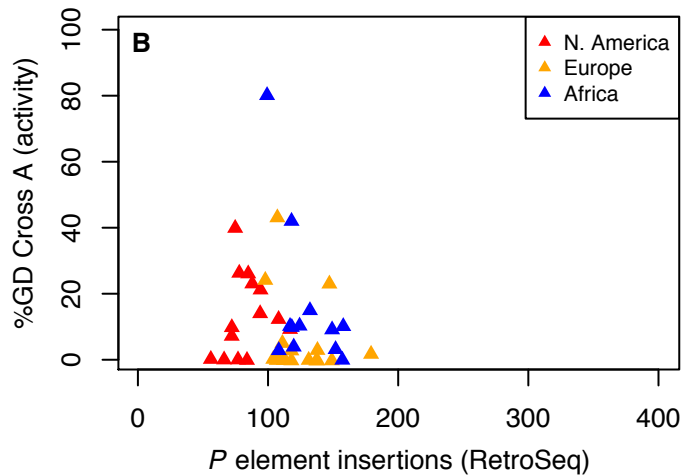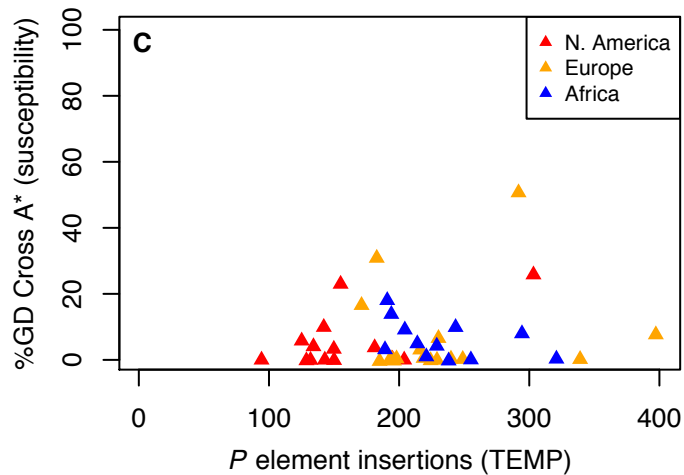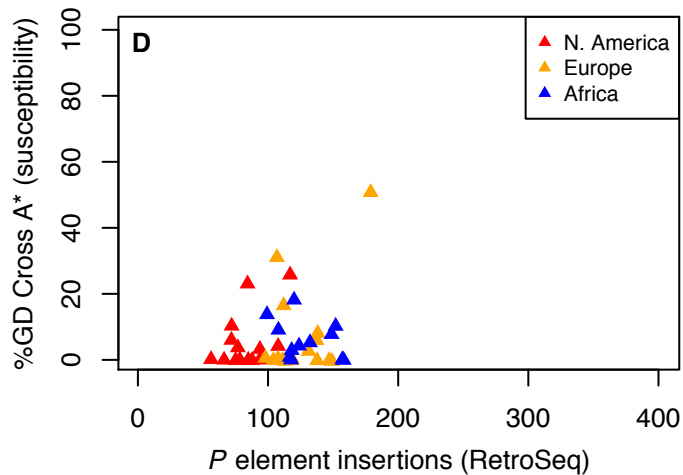

Source: http://biorxiv.org/content/10.1101/107169v1.full.pdf
